# Supplementary material for: LMNA Co-Regulated Gene Expression as a Suitable Readout after Precise Gene Correction
Source: MDPI journal article supplement (doi:10.3390/ijms232415525), 2022-12-08
Supplement: s1 [file s1]

## **LMNA co-regulated gene expression as a suitable readout after precise gene correction**

Haicui Wang<sup>1,2,3\*</sup>, Anne Krause<sup>1,2,3</sup>, Helena Escobar<sup>1,2,3</sup>, Stefanie Müthel<sup>1,2,3</sup>, Eric Metzler<sup>1,2,3</sup>, Simone Spuler<sup>1,2,3\*</sup>

1 Muscle Research Unit, Experimental and Clinical Research Center, a Cooperation between the Max Delbrück Center for Molecular Medicine in the Helmholtz Association and the Charité—Universitätsmedizin Berlin, 13125 Berlin, Germany

2 Max Delbrück Center for Molecular Medicine in the Helmholtz Association (MDC), 13125 Berlin, Germany.

3 Charité Universitätsmedizin Berlin, 13125 Berlin, Germany.

\* Correspondence: haicui.wang215@gmail.com (H.W.); simone.spuler@charite.de (S.S.);

Tel.: +49-30-450-540-518 (H.W.); +49-30-450-540-501 (S.S.); Fax: +49-30-450-540-914 (H.W. and S.S.)

Supplementary FigureS1 Mutation impact on lamin proteins

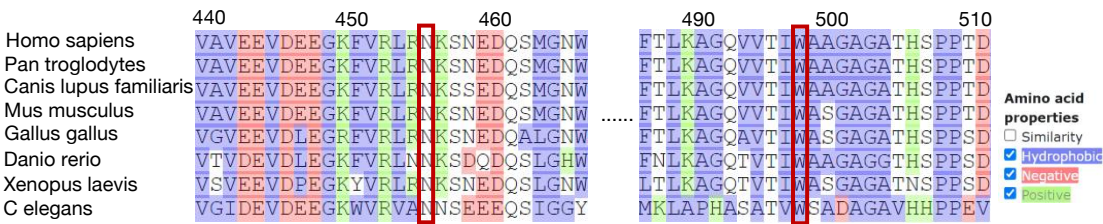

Sequence conservation of affected amino acid (N456, W498) across species. The canonical ones of lamin proteins were chosen from Uniprot and aligned in Uniprot.

Supplementary FiguresS2 Generation of patient–derived iPSCs and quality control

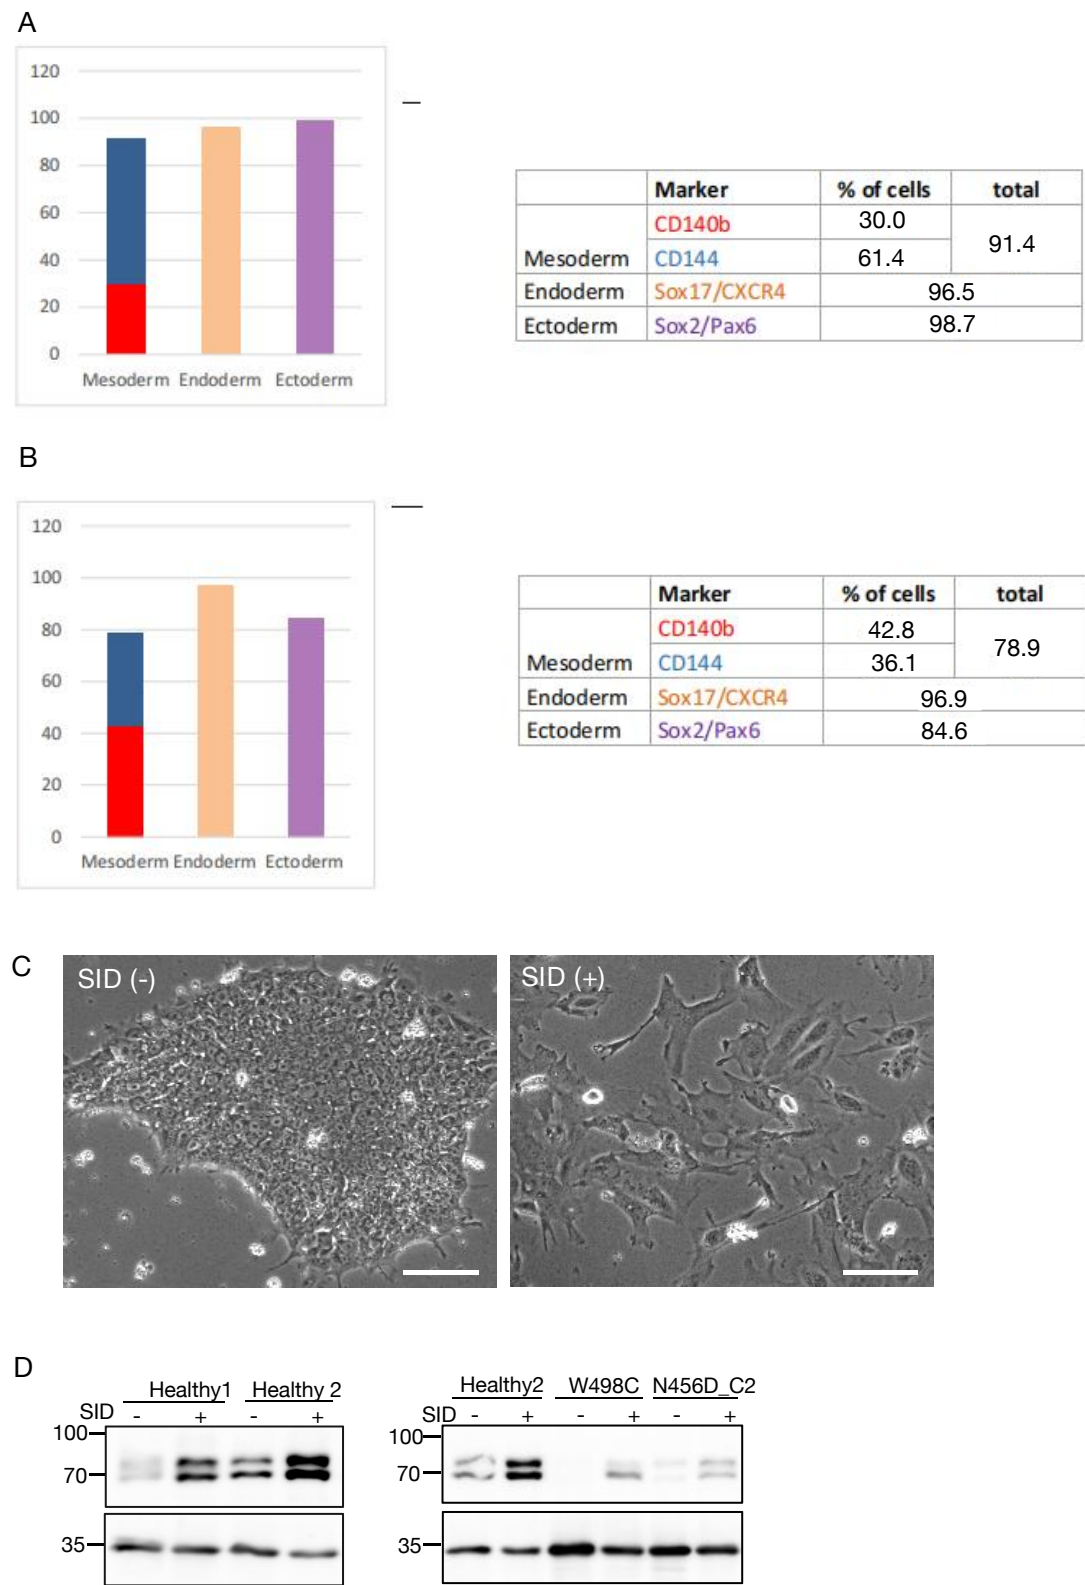

A-B. The cell line iPSC N456D\_C1 (A) and N456D\_C2 (B) shows potency to differentiate into mesoderm, ectoderm and endoderm lineages. N456D\_C1 (A) or C2 (B): patient hiPSCs<sup>LMNA<sup>c.1366A>G</sup>/LMNA<sup>\_WT</sup></sup> clone 1 or clone 2.

Other characterization also performed but not showed here including:

- The lineage markers CD140b, CD144 (Mesoderm), Sox2, Pax6 (Ectoderm) and Sox17.
- CD184 (Endoderm) showed positive FACS results.
- The free of mycoplasma and sendai virus.
- The SNP karyotyping with PBMCs as control and also STR analysis.

C. The zoomed images of Figure 2B showed the the dissociated of the iPSC colony of the small rounded cells to enlarged, separated, adhensive cells. Scale bar 100  $\mu$ m.

D. Western blot of laminA/C protein expression in healthy and patient–derived iPSCs prior to and after SID. A second healthy control iPSC line (healthy2) and a second clone for patient iPSC LMNA N456D (N456D\_C2) were included. Healthy1: hiPSC<sup>LMNA\_WT/LMNA\_WT</sup>; W498C: patient hiPSCs<sup>LMNAc.1494G>T/LMNA\_WT</sup>; N456D\_C2: patient hiPSCs<sup>LMNAc.1366A>G/LMNA\_WT</sup> clone 2.

### Supplementary Figures3 LMNA mRNA expression in patient–derived iPSCs

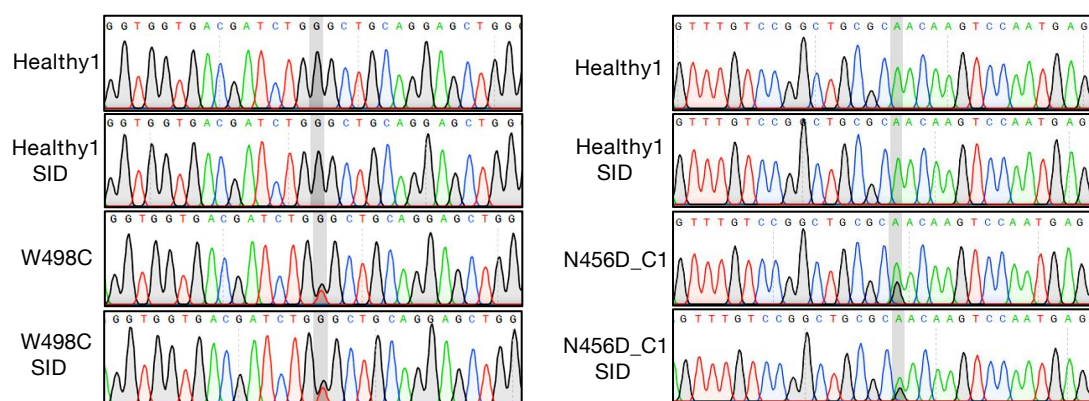

LMNA mRNA expression in healthy and patient–derived iPSCs prior to and after SID. Sequencing results for reverse transcription (RT) product from mRNAs confirmed the expression of both alleles in patient-derived iPSCs. Healthy1: hiPSC<sup>LMNA\_WT/LMNA\_WT</sup>; W498C: patient hiPSCs<sup>LMNAc.1494G>T/LMNA\_WT</sup>; N456D\_C1: patient hiPSCs<sup>LMNAc.1366A>G/LMNA\_WT</sup> clone 1.

Supplementary Figures4 LMNA co-regulated

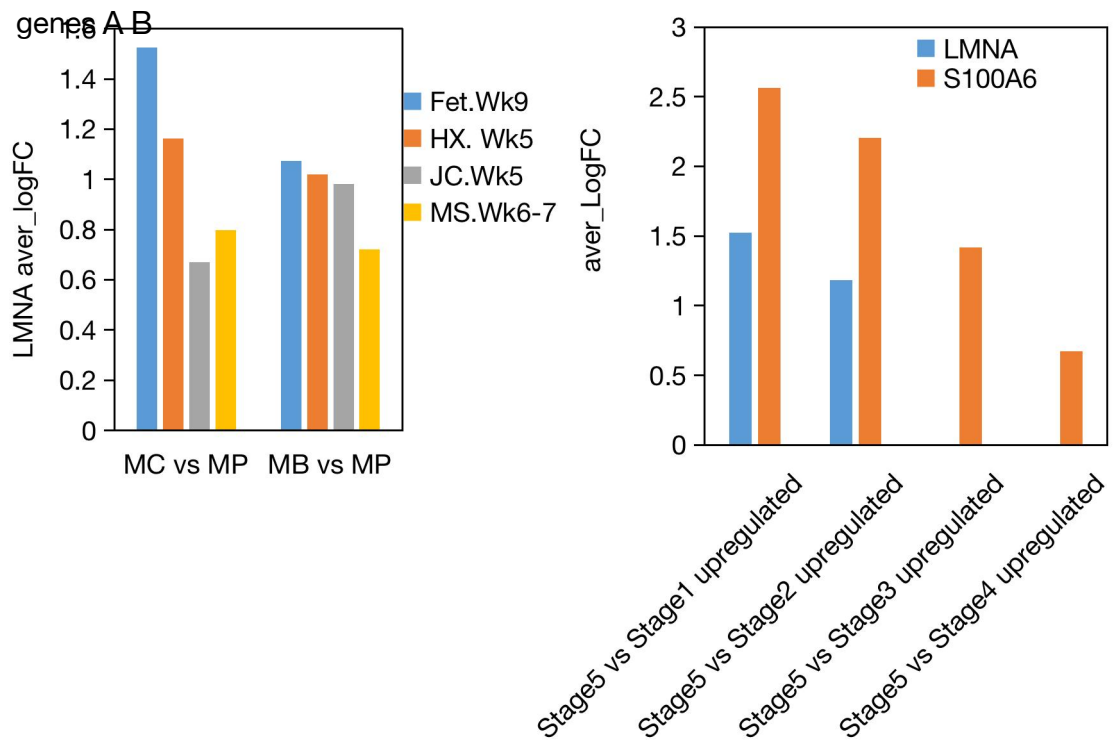

C

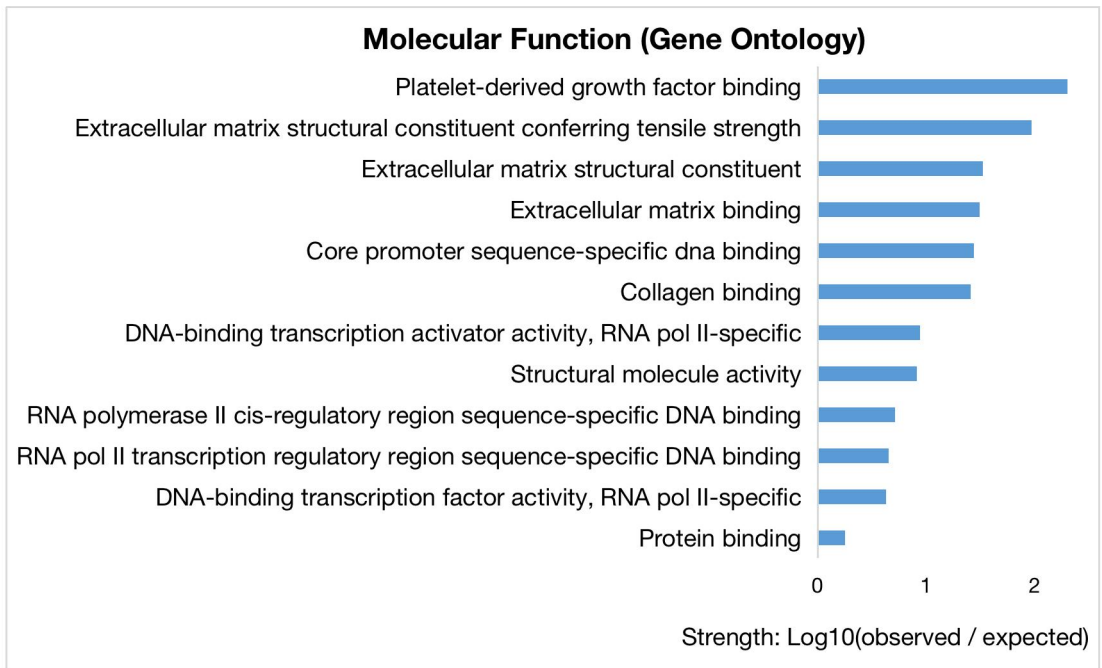

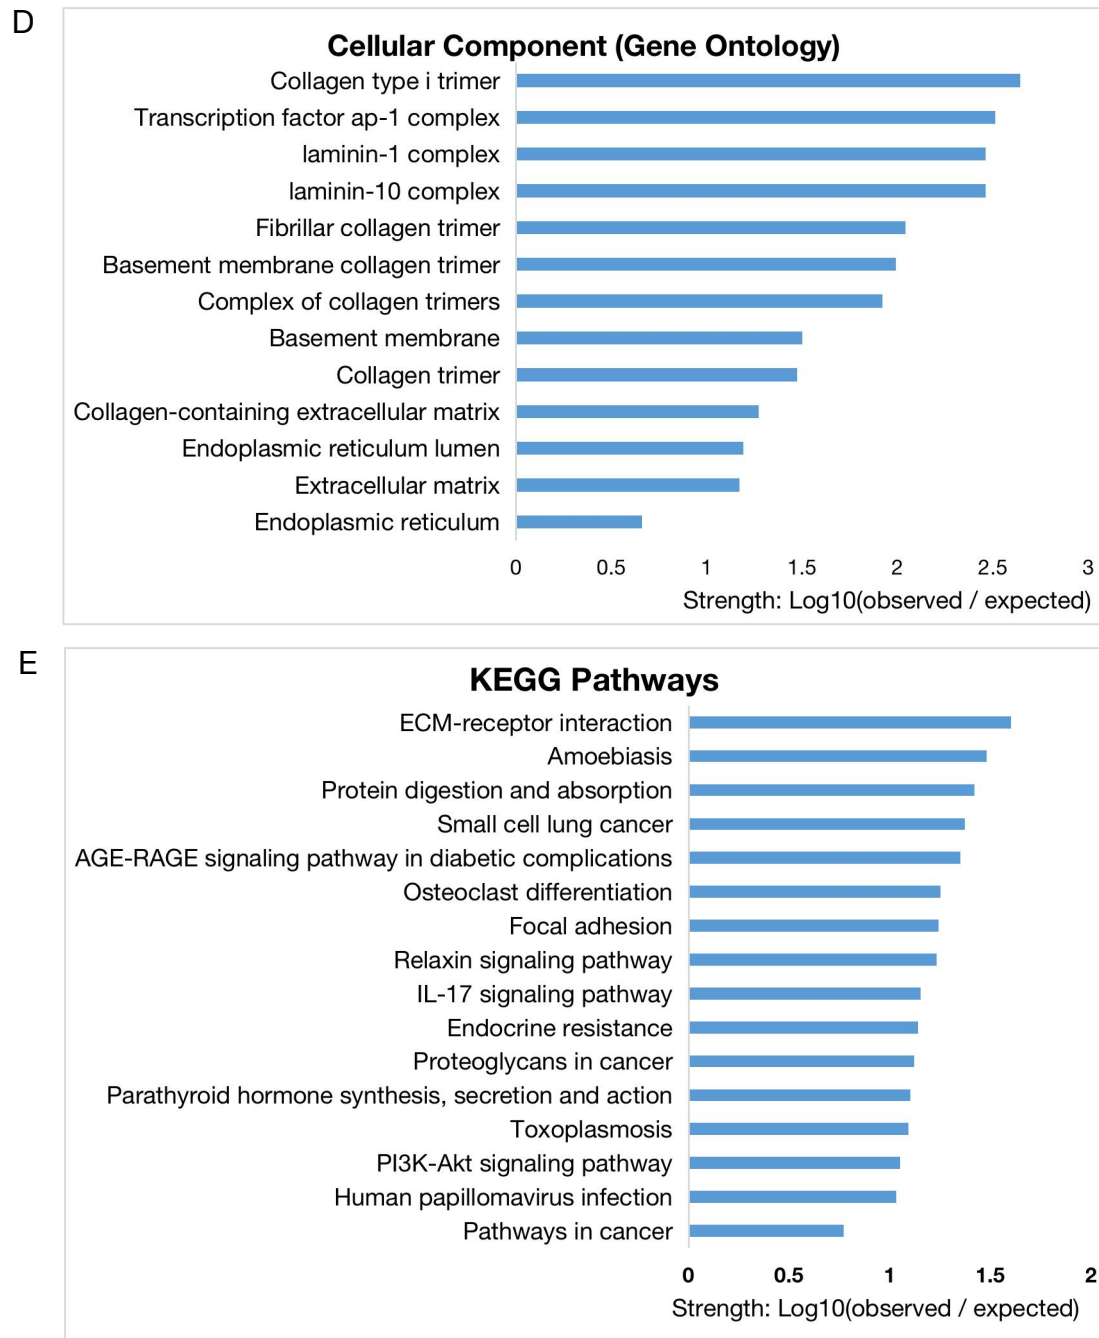

A. RNA seq data from Xi et al. 2020 ((13), [https://www.ncbi.nlm.nih.gov/pmc/articles/PMC7367475/bin/NIHMS1590276-supplement-Table\\_S2.xlsx](https://www.ncbi.nlm.nih.gov/pmc/articles/PMC7367475/bin/NIHMS1590276-supplement-Table_S2.xlsx)) showed LMNA gene was upregulated in myocytes (MC) and myoblasts (MB) compared to myogenic progenitors (MP) in early stages of three myogenic differentiation methods (HX/JC/MS) and in fetal muscle samples.

B. RNA seq data from Xi et al., 2020 ((13), [https://www.ncbi.nlm.nih.gov/pmc/articles/PMC7367475/bin/NIHMS1590276-supplement-Table\\_S3.xlsx](https://www.ncbi.nlm.nih.gov/pmc/articles/PMC7367475/bin/NIHMS1590276-supplement-Table_S3.xlsx)) showed co-regulated gene S100A6 and LMNA along the different myogenesis stages.

C-E. Gene ontology analysis and KEGG pathway analysis.

Supplementary FigureS5 LMNA co-regulated gene prior to and after SID

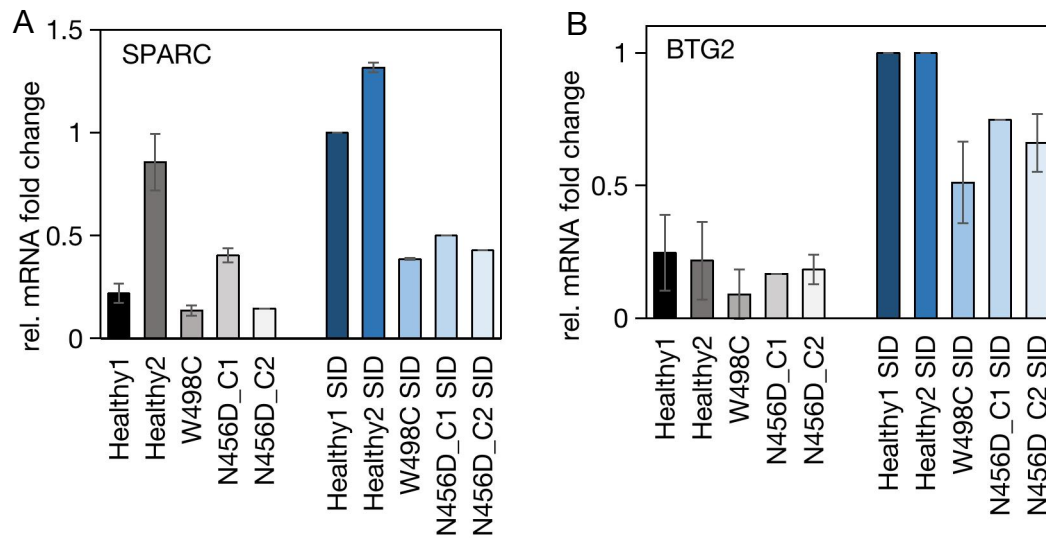

Gene expression of LMNA co-regulated genes SPARC (A) and BTG2 (B) prior to and after SID. Two healthy control iPSC cell line (healthy1 and healthy2) and two clones of iPSCs from LMNA N456D patients (N456D\_C1, N456D\_C2) were included in validating the selected gene expression. Healthy1 and Healthy2: hiPSC<sup>LMNA\_WT/LMNA\_WT</sup>; W498C: patient hiPSCs<sup>LMNAc.1494G>T/LMNA\_WT</sup>; N456D\_C1 or C2: patient hiPSCs<sup>LMNAc.1366A>G/LMNA\_WT</sup> clone 1 or clone 2.

Supplementary FigureS6 CBE base editing with double vectors in patient-derived iPSCs

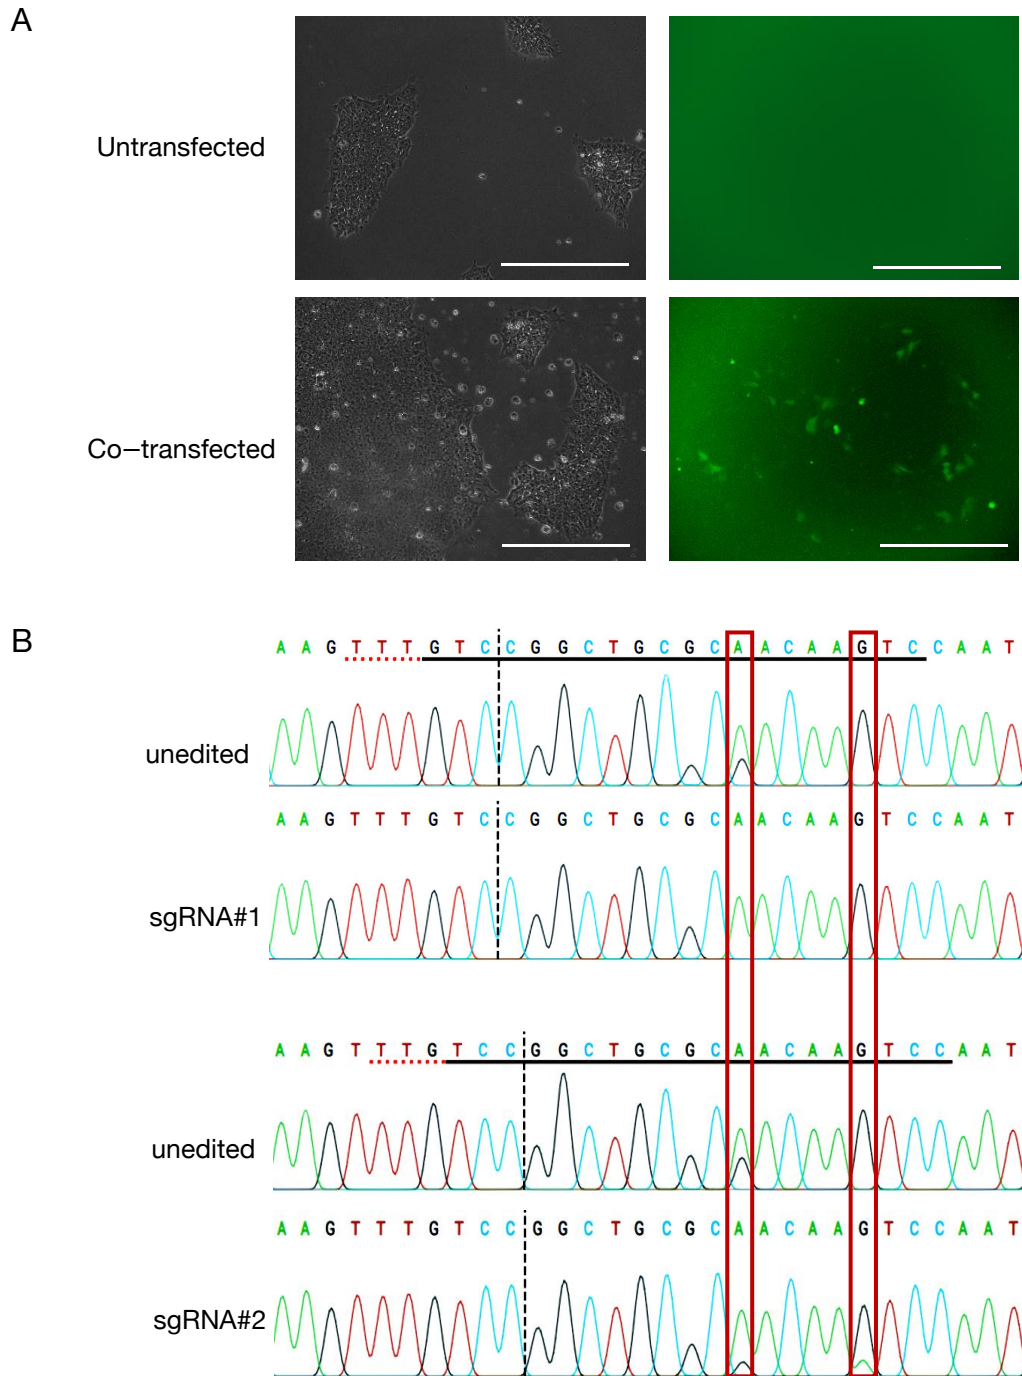

A. Co-transfection of one vector carrying the CBE4max\_SpRY with a GFP reporter and one vector carrying the sgRNA to iPSCs N456D\_C1 with lipofectamine. N456D\_C1: patient hiPSCs<sup>LMNAc.1366A>G/LMNA<sup>WT</sup></sup> clone 1.

B. The iPSCs after 24 hour transfection. Positive GFP signal indicated the expression of the CBE4max\_SpRY

C. Cells were FACS sorted after 36 hours of transfection and the genomic DNA sequence was analyzed. The sgRNA#2 introduced extra bystander editing.

Supplementary FigureS7 LMNA and its co-regulated gene expression after base editing

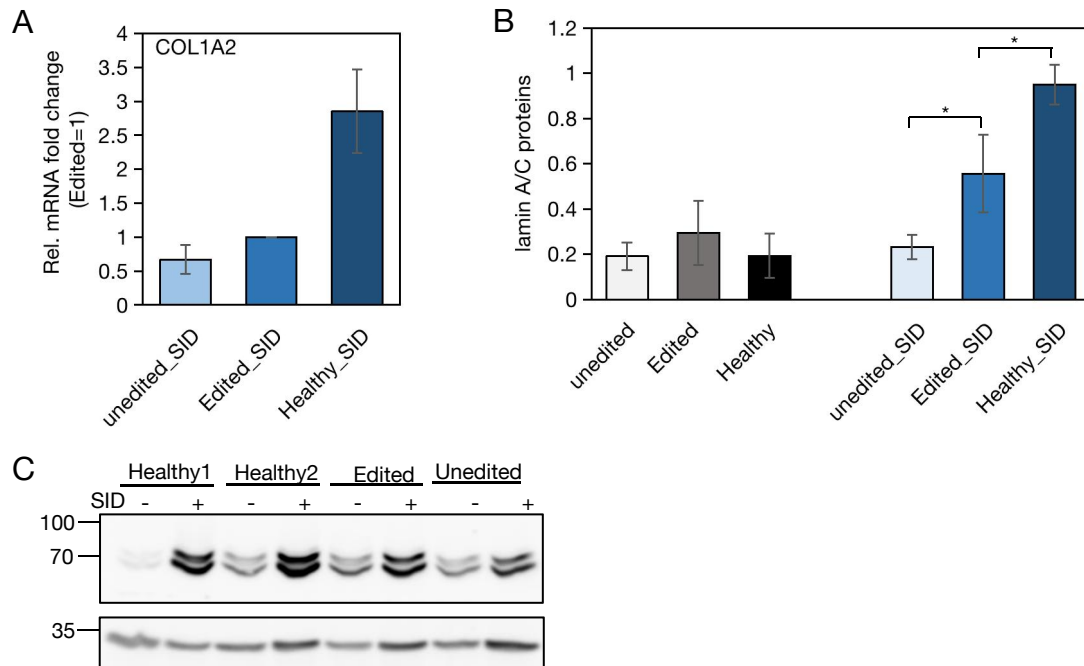

A. LMNA co-regulated gene COL1A2 mRNA expression in edited vs unedited iPSC N456D\_C2 after SID (N=3;  $P < 0.05$ ). Healthy control includes both healthy1 and healthy2.

B-C. The lamin A/C protein levels between unedited and edited iPSC N456D\_C2 iPSCs, between the edited N456D\_C2 and the healthy control (N=3,  $P < 0.05$ ). Healthy control includes both healthy1 and healthy2. Healthy1 and Healthy2: hiPSC<sup>LMNA<sub>WT</sub>/LMNA<sub>WT</sub></sup>; N456D\_C2: patient hiPSCs<sup>LMNA<sub>c.1366A>G</sub>/LMNA<sub>WT</sub></sup> clone 2.

Supplementary Table S1 Primers used for sequencing and qPCR

| Primer Name    | Applications     | Sequence (5' to 3')     |
|----------------|------------------|-------------------------|
| LMNA_P1_fw     | genotyping N456D | GCAACTGGCCTTGACTAGAC    |
| LMNA_P1_rev    |                  | GCTCAAGGTCTCACAGCCA     |
| LMNA_P2_fw     | genotyping W498C | CAGTGACAGGGGTGTGTGTAG   |
| LMNA_P2_rev    |                  | CTTCCCCAGTGGAGTTGATG    |
| LMNA_P3_fw     | RT N456D         | CTTCTGGACATCAAGCTGGC    |
| LMNA_P3_rev    |                  | TTCTGTGCCTTCCACACCAG    |
| LMNA_P3_fw     | RT W498C         | CTTCTGGACATCAAGCTGGC    |
| LMNA_P4_rev    |                  | TCCATCCTCATCCTCGTCGT    |
| LMNA_P5_fw     | qPCR primers     | CGCAGGCCAGCTCCAC        |
| LMNA_P5_rev    |                  | TCCTGCAGGTCCTCCTTCTC    |
| LMNA_P6_fw     |                  | GTGGAAGGCACAGAACACCT    |
| LMNA_P4_rev    |                  | TCCATCCTCATCCTCGTCGT    |
| FOSB fw        |                  | GCTGCAAGATCCCCTACGAAG   |
| FOSB rev       |                  | ACGAAGAAGTGTACGAAGGGTT  |
| FOS P1 fw      |                  | CTGTCAACGCGCAGGACTTC    |
| FOS P1 rev     |                  | TCATGGTCTTCACAACGCCA    |
| FOS P2 fw      |                  | CTGATACACTCCAAGCGGAGAC  |
| FOS P2 rev     |                  | AGGGTCATTGAGGAGAGGCA    |
| S100A6 fw      |                  | CTCCCTACCGCTCCAAGC      |
| S100A6 rev     |                  | CTGGAAGTTCACCTCCTGGTC   |
| PTRF P1 FW     |                  | GAGGACCCACGCTCTATATT    |
| PTRF P1 ReV    |                  | CCCCGATGATTTTGTCCAGGA   |
| PTRF P2 FW     |                  | GGGCCGTAGACCAGATCCA     |
| PTRF P2 ReV    |                  | CTTGCTCACCGTATTGCTCGT   |
| LGALS1 FW      |                  | CTGTGCCTGCACTTCAACC     |
| LGALS1 rev     |                  | CATCTGGCAGCTTGACGGT     |
| COL3A1 P1 fw   |                  | GGAGCTGGCTACTTCTCGC     |
| COL3A1 P1 rew  |                  | GGGAACATCCTCCTTCAACAG   |
| COL3A1 P2 fw   |                  | GCCAAATATGTGTCTGTGACTCA |
| COL3A1 P2 rev  |                  | GGGCGAGTAGGAGCAGTTG     |
| SPARCL1 p1 FW  |                  | ACAGGGCAAGAGTTCTAGCCA   |
| SPARCL1 p1 rev |                  | TTGGTGCATACTCCAAATTCACA |
| SPARCL1 p2 FW  |                  | CCAACTGAAGGTACATTGGACAT |
| SPARCL1 p2 rev |                  | CTGTGAAGGAACTAACACCAGG  |
| SPARC p1 FW    |                  | TGAGGTATCTGTGGGAGCTAATC |
| SPARC p1 rev   |                  | CCTTGCCGTGTTTGCAGTG     |
| SPARC p2 FW    |                  | CCCATTGGCGAGTTTGAGAAG   |
| SPARC p2 rev   |                  | CAAGGCCCGATGTAGTCCA     |
| S100A4 fw      |                  | GATGAGCAACTTGGACAGCAA   |
| S100A4 rev     |                  | CTGGGCTGCTTATCTGGGAAG   |

|             |                         |
|-------------|-------------------------|
| S100A10 fw  | GGCTACTTAACAAAGGAGGACC  |
| S100A10 rev | GAGGCCCGCAATTAGGGAAA    |
| EGR1 fw     | CCACGCCGAACACTGACATT    |
| EGR1 rev    | GAGGGGTTAGCGAAGGCTG     |
| COL4A1 fw   | GGACTACCTGGAACAAAAGGG   |
| COL4A1 rev  | GCCAAGTATCTCACCTGGATCA  |
| LAMB1 fw    | CACAAGCCCGAACCCTACTG    |
| LAMB1 rev   | GACCACATTTTCAATGAGATGGC |
| CD44 fw     | CTGCCGCTTTGCAGGTGTA     |
| CD44 rev    | CATTGTGGGCAAGGTGCTATT   |
| COL15A1 fw  | CTGCCCTCGTCCGTATCCT     |
| COL15A1 rev | CTGATGGCGAAGTCCCTGA     |
| LAMA2 fw    | TGCTGTCCTGAATCTTGCTTC   |
| LAMA2 rev   | AGCATTTGTAATCGGGTGTCTC  |
| NR3C1 fw    | TGCCGCTATCGAAAATGTCTT   |
| NR3C1 rev   | GGGTAGGGGTGAGTTGTGGT    |
| COL1A2 fw   | GGCCCTCAAGGTTTCCAAGG    |
| COL1A2 rev  | CACCCTGTGGTCCAACAACCTC  |
| P4HA2 fw    | GGCCTGGTTTGGTGCCTG      |
| P4HA2 rev   | GCCCAGCTCTTAATCTTGGAAG  |
| AHNAK fw    | AACTCAAGGGTCCAAAGTTCAAG |
| AHNAK rev   | GAGAGACATCCACATCACCTTTC |
| BTG2 fw     | ACGGGAAGGGAACCGACAT     |
| BTG2 rev    | CAGTGGTGTTTGTAGTGCTCTG  |
| COL6A1 fw   | ACAGTGACGAGGTGGAGATCA   |
| COL6A1 rev  | GATAGCGCAGTCGGTGTAGG    |
| JUNB fw     | ACAAACTCCTGAAACCGAGCC   |
| JUNB rev    | CGAGCCCTGACCAGAAAAGTA   |
| DLK1 fw     | AGGGTCCCCTTTGTGACCA     |
| DLK1 rev    | GCAGGCCCGAACATCTCTATC   |
| MATN2 fw    | GATCCTCGGACAGATCGTCCT   |
| MATN2 rev   | CTGCCCCTTGTCTCACA       |
| SPATS2L fw  | AAGCAGCATCAAGGCAACAAA   |
| SPATS2L rev | TTCTCGCAGCCATTTCATGGG   |
| CD82 fw     | GCTCATTCGAGACTACAACAGC  |
| CD82 rev    | GTGACCTCAGGGCGATTCA     |
| OLFML2A fw  | CACGCCTACGTCCACAAGG     |
| OLFML2A rev | TCATAGTGCCTCAACTGCTCA   |
| CD63 fw     | CAGTGGTCATCATCGCAGTG    |
| CD63 rev    | ATCGAAGCAGTGTGGTTGTTT   |
| TXNIP fw    | TGTGTGAAGTTACTCGTGTCAAA |
| TXNIP rev   | GCAGGTACTCCGAAGTCTGT    |
| SOGA3 fw    | GTTTCGCTGCGACAGACAATC   |

|            |  |                         |
|------------|--|-------------------------|
| SOGA3 rev  |  | GGCTCCCGGTCTTGTTACC     |
| TPPP3 fw   |  | AAGTCTGCTCGGGTCATCAAC   |
| TPPP3 rev  |  | GAGCCCGTGTATCTGCTGG     |
| RASSF4 fw  |  | TAAGACCTCCGTGTTTACTCCA  |
| RASSF4 rev |  | GATGTAGAGTGCGAACTCACTG  |
| SEMA3C fw  |  | TTTGCGTGTTGGTTGGAGTAT   |
| SEMA3C rev |  | TCCTGTAGTCTAAAGGATGGTGG |

Supplementary Table S2 Gene correlation score with LMNA

(Extracted from Xi et al., 2020, RNA-seq data link:

[https://www.ncbi.nlm.nih.gov/pmc/articles/PMC7367475/bin/NIHMS1590276-supplement-Table\\_S6.xlsx](https://www.ncbi.nlm.nih.gov/pmc/articles/PMC7367475/bin/NIHMS1590276-supplement-Table_S6.xlsx) )

| Target_Gene   | Corr (to LMNA) |
|---------------|----------------|
| S100A6        | 0.227843323    |
| PTRF (CAVIN1) | 0.223155381    |
| SPARCL1       | 0.222434649    |
| DLK1          | 0.222315039    |
| LGALS1        | 0.212318877    |
| COL3A1        | 0.199294588    |
| MATN2         | 0.196673838    |
| SPATS2L       | 0.187344991    |
| SPARC         | 0.181522567    |
| S100A4        | 0.176378223    |
| CD82          | 0.174338061    |
| MEG3          | 0.173108788    |
| OLFML2A       | 0.171756085    |
| S100A10       | 0.171339814    |
| EGR1          | 0.160695221    |
| FOSB          | 0.158278831    |
| COL4A1        | 0.157229474    |
| CD63          | 0.154926244    |
| LAMB1         | 0.153986923    |
| TXNIP         | 0.151123669    |
| CD44          | 0.148691777    |
| COL15A1       | 0.147519494    |
| LAMA2         | 0.1470055      |
| NR3C1         | 0.145894724    |
| COL1A2        | 0.136816817    |
| P4HA2         | 0.134948929    |
| FOS           | 0.134449557    |
| SOGA3         | 0.1334006      |
| AHNAK         | 0.132955064    |
| TPPP3         | 0.132569713    |
| BTG2          | 0.130908187    |
| COL6A1        | 0.127789726    |
| RASSF4        | 0.127020642    |
| JUNB          | 0.126404984    |
| SEMA3C        | 0.125539208    |

SupplementaryTableS3 LMNA co-regulated gene expression (fold change) prior to and after SID

| Gene    | Healthy1 | Healthy1_SID | W498C | W498C_SID | N456D | N456D_SID |
|---------|----------|--------------|-------|-----------|-------|-----------|
| S100A6  | 1.00     | 74.26        | 0.26  | 5.71      | 1.29  | 17.62     |
| COL3A1* | 1.00     | 49.91        | 0.71  | 7.22      | 0.78  | 27.98     |
| LGALS1  | 1.00     | 13.06        | 0.47  | 1.70      | 0.74  | 2.91      |
| AHNAK   | 1.00     | 12.44        | 0.19  | 9.58      | 1.07  | 14.50     |
| CD44    | 1.00     | 7.16         | 0.70  | 3.05      | 1.01  | 4.31      |
| NR3C1   | 1.00     | 7.01         | 1.40  | 6.95      | 2.20  | 8.27      |
| SEMA3C  | 1.00     | 6.70         | 0.30  | 0.71      | 0.61  | 3.95      |
| OLFML2A | 1.00     | 6.47         | 2.88  | 3.66      | 7.43  | 5.34      |
| PTRF P1 | 1.00     | 6.12         | 0.05  | 0.56      | 0.56  | 5.85      |
| LMNA    | 1.00     | 5.41         | 0.32  | 1.88      | 0.65  | 2.53      |
| S100A10 | 1.00     | 5.20         | 0.35  | 1.26      | 0.53  | 2.64      |
| COL1A2  | 1.00     | 4.83         | 0.38  | 1.27      | 1.71  | 2.79      |
| P4HA2   | 1.00     | 4.49         | 1.72  | 2.42      | 4.62  | 3.46      |
| S100A4  | 1.00     | 4.18         | 0.76  | 1.24      | 3.90  | 2.65      |
| MATN2   | 1.00     | 4.01         | 0.43  | 1.16      | 2.03  | 3.00      |
| SPARC   | 1.00     | 3.98         | 0.66  | 1.57      | 1.53  | 2.06      |
| COL4A1  | 1.00     | 3.32         | 0.80  | 1.14      | 2.02  | 2.12      |
| LAMB1   | 1.00     | 3.00         | 1.33  | 2.11      | 1.68  | 2.67      |
| CD63    | 1.00     | 2.57         | 0.81  | 1.60      | 3.87  | 2.32      |
| EGR1    | 1.00     | 2.46         | 5.47  | 8.28      | 1.73  | 3.97      |
| BTG2    | 1.00     | 2.39         | 1.06  | 2.45      | 2.30  | 1.32      |
| SPARCL1 | 1.00     | 1.83         | 1.61  | 1.12      | 3.67  | 2.12      |
| FOSB    | 1.00     | 1.80         | 1.80  | 1.03      | 1.96  | 1.78      |
| SPATS2L | 1.00     | 1.78         | 0.70  | 0.83      | 0.95  | 1.81      |
| DLK1    | 1.00     | 1.68         | 0.67  | 2.84      | 15.22 | 2.64      |
| TXNIP   | 1.00     | 1.67         | 2.10  | 1.28      | 0.76  | 3.65      |
| FOS     | 1.00     | 1.64         | 1.02  | 0.88      | 0.77  | 1.22      |
| LAMA2   | 1.00     | 1.46         | 0.70  | 0.68      | 2.06  | 1.13      |
| CD82    | 1.00     | 1.35         | 1.33  | 1.21      | 4.54  | 1.25      |
| COL6A1  | 1.00     | 1.26         | 0.83  | 0.47      | 2.64  | 1.24      |
| TPPP3   | 1.00     | 0.79         | 1.00  | 0.88      | 2.27  | 0.86      |
| JUNB    | 1.00     | 0.60         | 0.85  | 0.52      | 1.56  | 1.00      |
| SOGA3   | 1.00     | 0.59         | 1.47  | 0.29      | 1.20  | 0.37      |
| RASSF4  | 1.00     | 0.46         | 1.43  | 0.77      | 2.28  | 0.67      |
| COL15A1 | 1.00     | 0.31         | 0.64  | 0.23      | 1.12  | 0.33      |

(\*COL3A1 very low expression with Ct>28 in all samples, excluded)
